# Supplementary material for: Efficient interspecies transmission of synthetic prions
Source: PLoS Pathog. 2021 Jul 14;17(7):e1009765. doi: 10.1371/journal.ppat.1009765 (PMC8312972; doi:10.1371/journal.ppat.1009765)
Supplement: S1 Table — (DOCX) [file ppat.1009765.s007.docx]

**S1 Table. Transmission and adaptation of murine synthetic prions to hamsters.**

|  |  |  |  |  | |  |
| --- | --- | --- | --- | --- | --- | --- |
|  |  |  |  | | Weight | |
| Inoculum | Route | Incubation Period | Clinical Duration | | % Incubation Perioda | Avg. (grams)b |
|  |  |  |  | |  |  |
| *Synthetic prions* |  |  |  | |  |  |
| Mouse WT | i.c. | 321±3c (5/5)d,e | 66±3 | | n.d.f | n.d. |
| Uninfected b.h.g | i.c. | 500 (0/5) | n.a.h | | n.a. | n.a. |
|  |  |  |  | |  |  |
|  |  |  |  | |  |  |
| *Brain derived prions* |  |  |  | |  |  |
| 1st hamster pass. MSP b.h. | i.c. | 129±5 (5/5) | 62±5 | | 111 | 169±6i |
| Uninfected b.h. | i.c. | 190 (0/5) | n.a. | | n.a. | 162±2 |
|  |  |  |  | |  |  |
|  |  |  |  | |  |  |
| 2nd hamster pass. MSP b.h. | i.c. | 113±3 (5/5) | 80±3 | | 78 | 193±16 |
| Uninfected b.h. | i.c. | 210 (0/5) | n.a. | | n.a. | 140±14 |
|  |  |  |  | |  |  |
|  |  |  |  | |  |  |
| 3rd hamster pass. MSP b.h. | i.c. | 115±3 (5/5) | 78±3 | | 79 | 206±4 |
| Uninfected b.h. | i.c. | 230 (0/5) | n.a. | | n.a. | 171±8 |
|  |  |  |  | |  |  |
|  |  |  |  | |  |  |
| 4th hamster pass. MSP b.h. | i.c. | 122±3 (5/5) | n.d. | | 54 | 202±1 |
| 4th hamster pass. MSP b.h. | i.p. | 224±3 (5/5) | n.d. | | 64 | 172±19 |
| 4th hamster pass. MSP b.h. | e.n. | 296±20 (5/5) | n.d. | | n.d. | n.d. |
| 4th hamster pass. MSP b.h. | p.o. | 288±3 (3/5) | n.d. | | n.d. | n.d. |
| Uninfected b.h. | i.c. | 290 (0/5) | n.a. | | n.a. | 138±7 |
|  |  |  |  | |  |  |

a At onset of statistically significant weight gain

b At onset of clinical signs

c Days±SEM

d Number affected / number inoculated

e Corresponds to 1st hamster passage in Figure 1

f n.d.—no data

g b.h.—brain homogenate

h n.a.—not applicable

i Average weight in grams±SEM
